# Supplementary material
Source: Royal Society of Chemistry journal article supplement (doi:10.1039/d6ta02878k)
Supplement: d6ta02878k1.pdf [file d6ta02878k1.pdf]

## Supplementary Information

### **Lewis-acid-engineered polymer electrolytes for all-solid-state lithium batteries**

Sitong Yao,<sup>a</sup> Hongpeng Chen,<sup>a</sup> Su Yan,<sup>a</sup> Zehui Fan,<sup>a</sup> Lanhua Ma,<sup>a</sup> Luchen Jia<sup>a</sup> and  
Yunhua Xu<sup>\*a</sup>

<sup>a</sup>School of Materials Science and Engineering, and State Key Laboratory of Advanced Materials for Intelligent Sensing, Tianjin University, Tianjin 300072, China

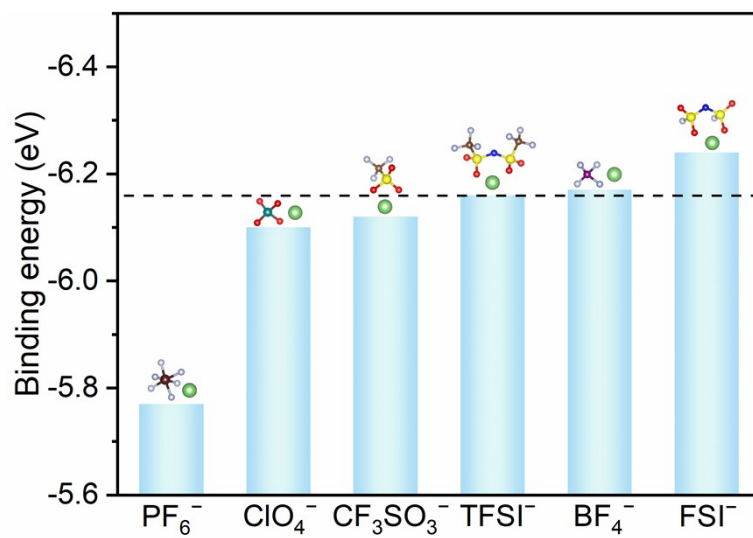

**Fig. S1** Binding energies of various lithium salt anions with  $\text{Li}^+$ .

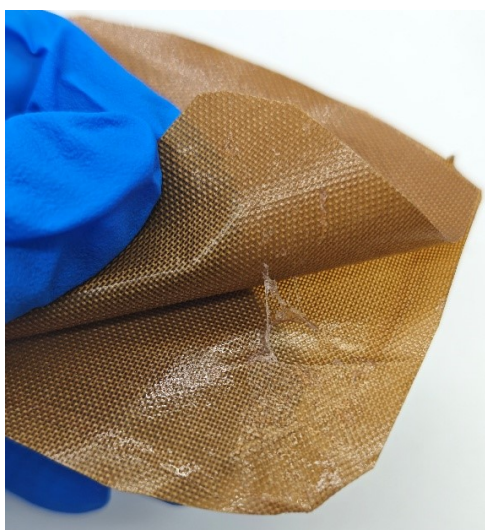

**Fig. S2** Optical image of  $\text{PEO}/\text{Co}(\text{BF}_4)_2$ .

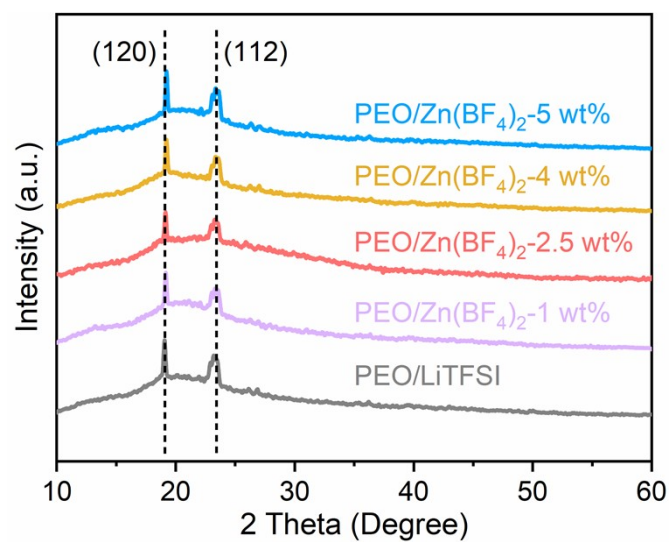

**Fig. S3** XRD patterns of SPEs with various amounts of  $\text{Zn}(\text{BF}_4)_2$ .

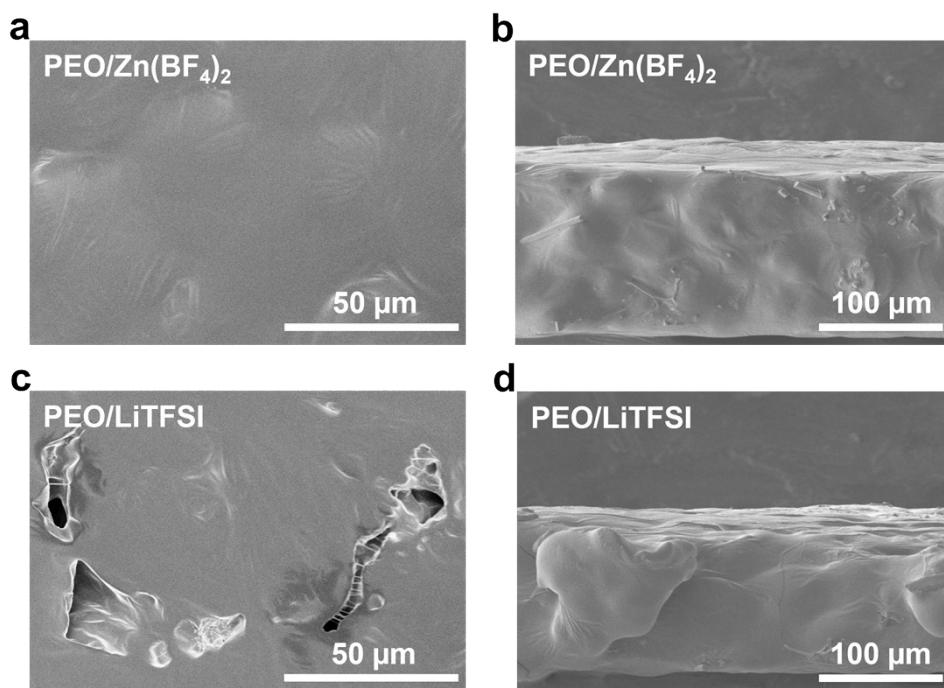

**Fig. S4** Surface and cross-sectional SEM images of (a, b)  $\text{PEO}/\text{Zn}(\text{BF}_4)_2$  and (c, d)  $\text{PEO}/\text{LiTFSI}$ .

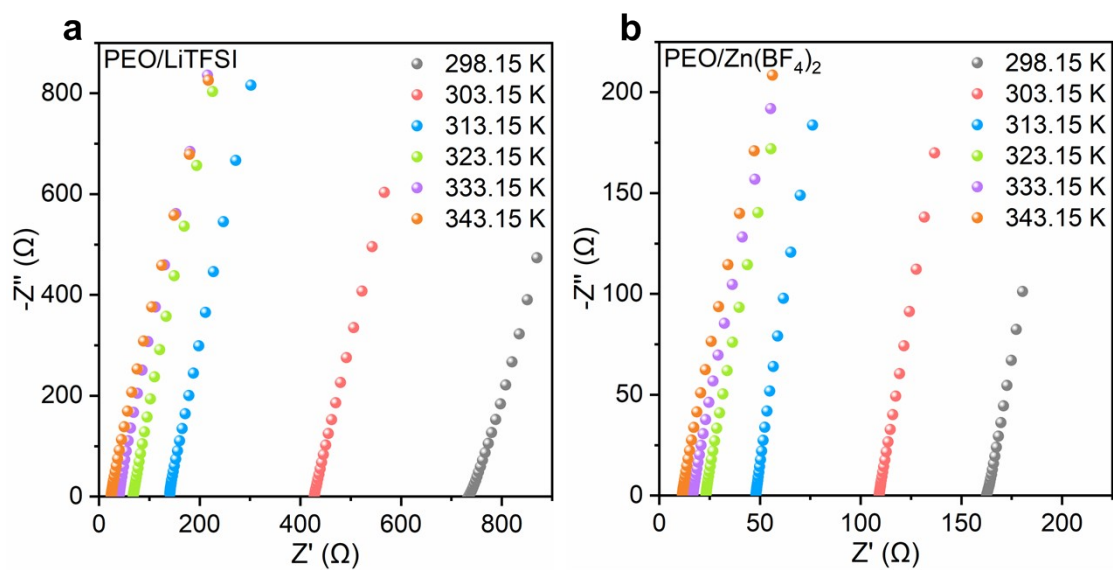

**Fig. S5** EIS plots of the SS|SPE|SS symmetric cells with (a) PEO/LiTFSI and (b) PEO/Zn(BF<sub>4</sub>)<sub>2</sub> at different temperatures ranging from 25 °C to 70 °C.

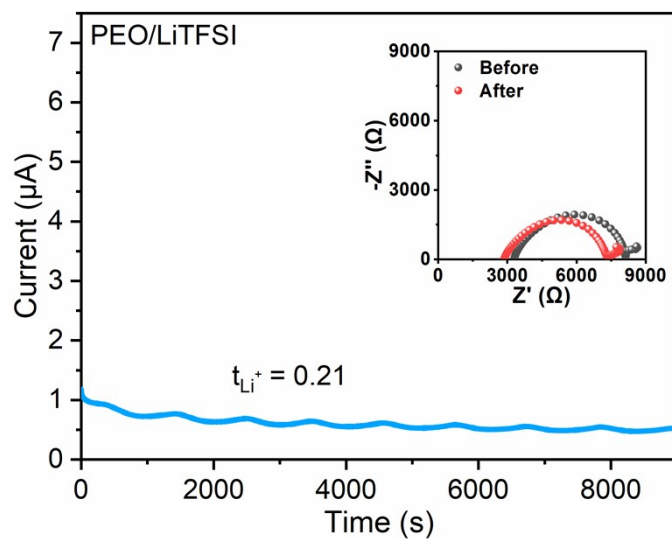

**Fig. S6** Direct current polarization profile of the Li|PEO/LiTFSI|Li symmetric cell, inserting the EIS plots before and after polarization.

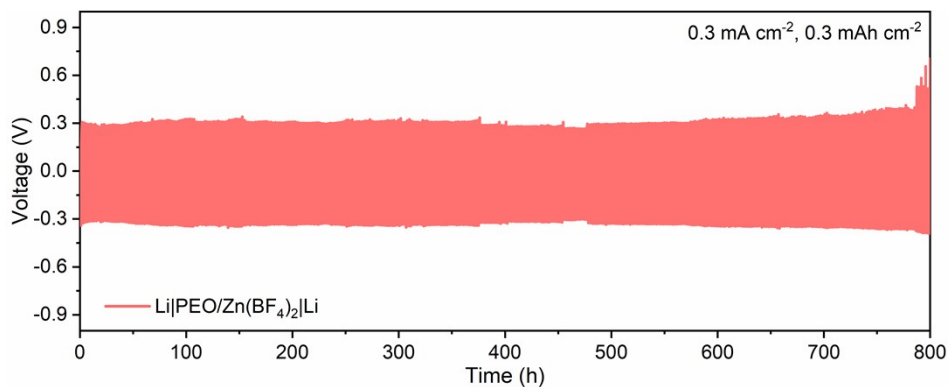

**Fig. S7** Voltage profile of the Li|PEO/Zn(BF<sub>4</sub>)<sub>2</sub>|Li symmetric cell at 0.3 mA cm<sup>-2</sup> with an areal capacity of 0.3 mAh cm<sup>-2</sup>.

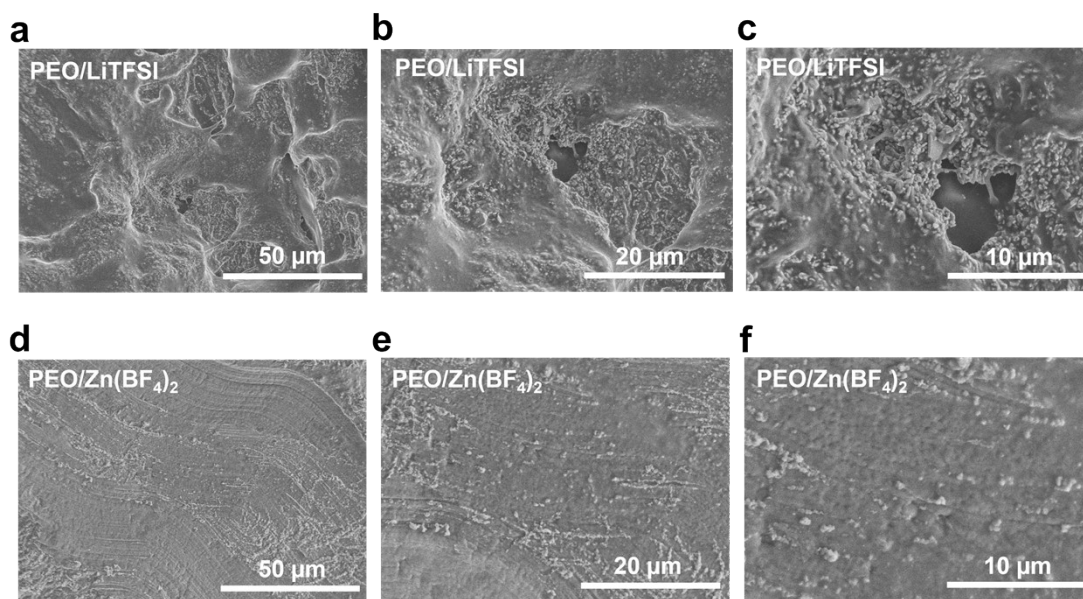

**Fig. S8** Surface SEM images of the cycled Li anodes retrieved from the cycled Li||Li cells in (a,b,c) PEO/LiTFSI and (d,e,f) PEO/Zn(BF<sub>4</sub>)<sub>2</sub>.

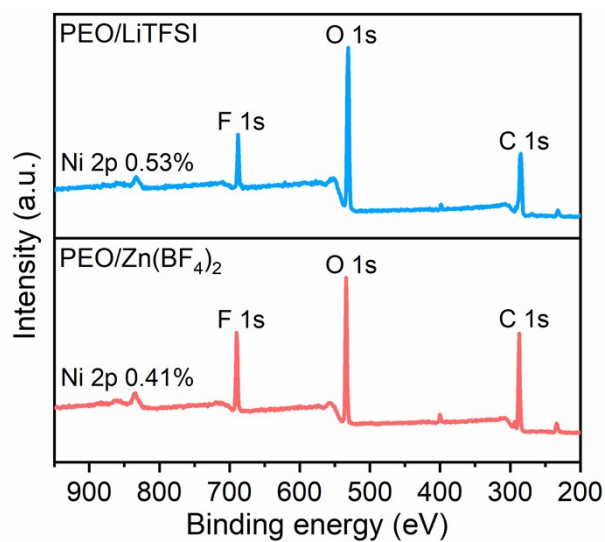

**Fig. S9** XPS survey spectra of cycled Li anodes in Li||NCM811 cells with PEO/Zn(BF<sub>4</sub>)<sub>2</sub> and PEO/LiTFSI.

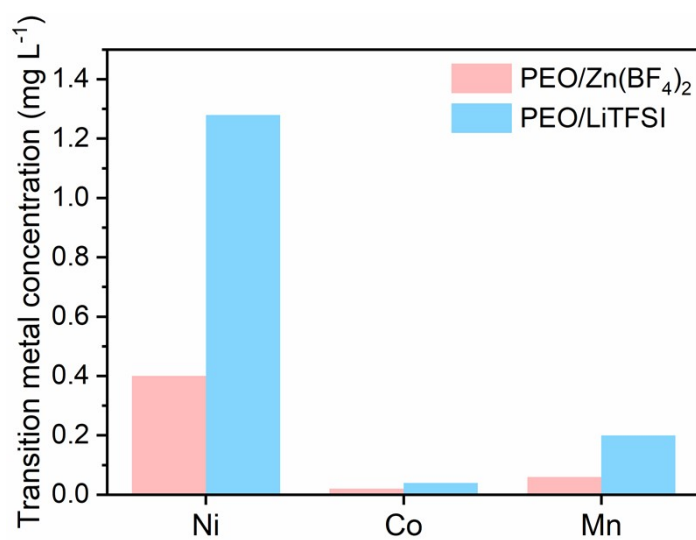

**Fig. S10** Transition metal residuals on the Li anodes detected by ICP-OES.

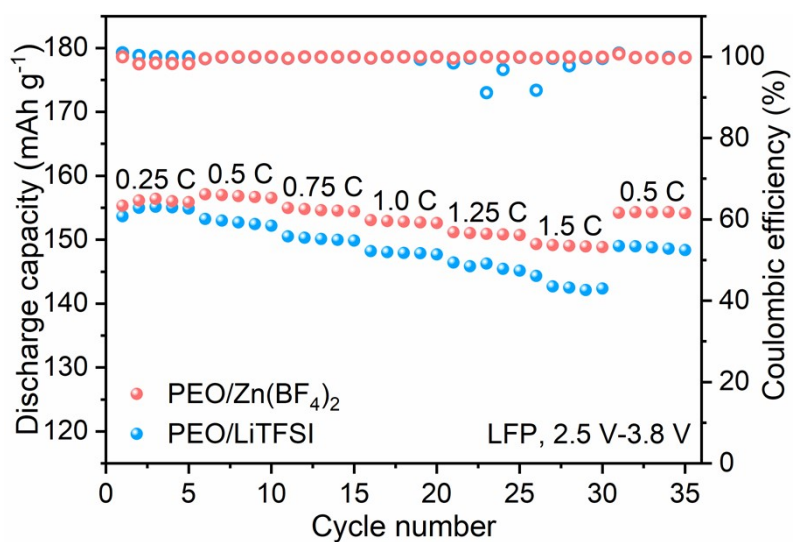

**Fig. S11** Rate performance of the Li||LFP cells with different electrolytes.

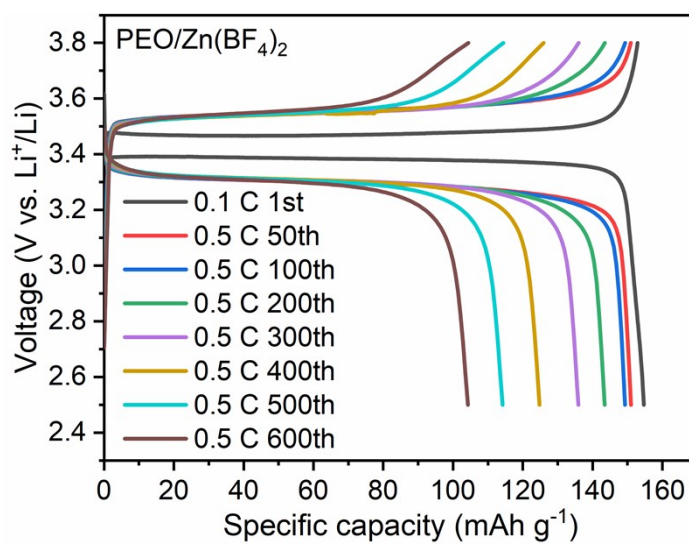

**Fig. S12** Galvanostatic charge/discharge voltage profiles of the Li|PEO/Zn(BF<sub>4</sub>)<sub>2</sub>|LFP cells in different cycles.

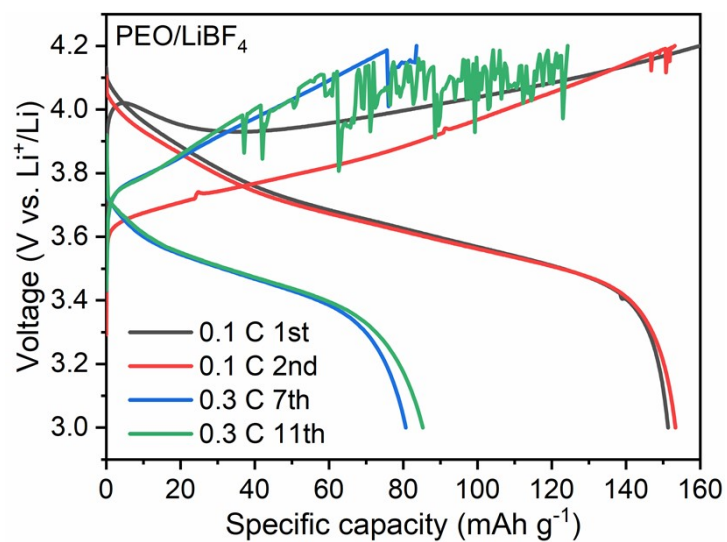

**Fig. S13** Galvanostatic charge/discharge voltage profiles of the Li||NCM811 cells with PEO/LiBF<sub>4</sub>.

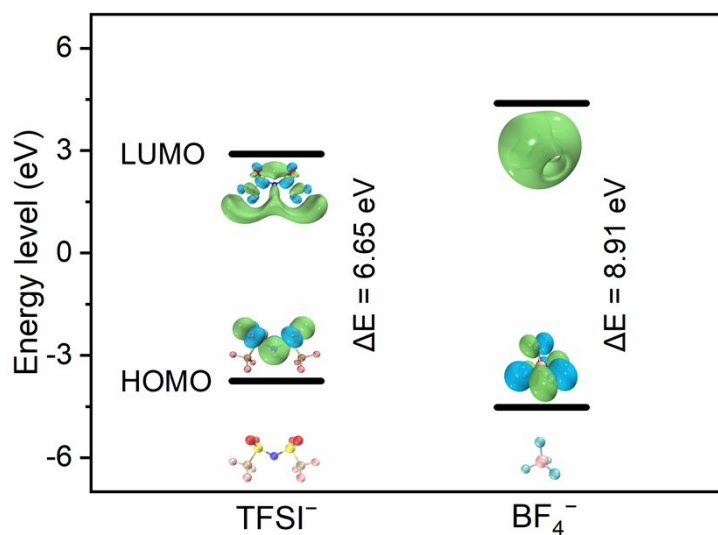

**Fig. S14** HOMO and LUMO energy levels of TFSI<sup>-</sup> and BF<sub>4</sub><sup>-</sup>.

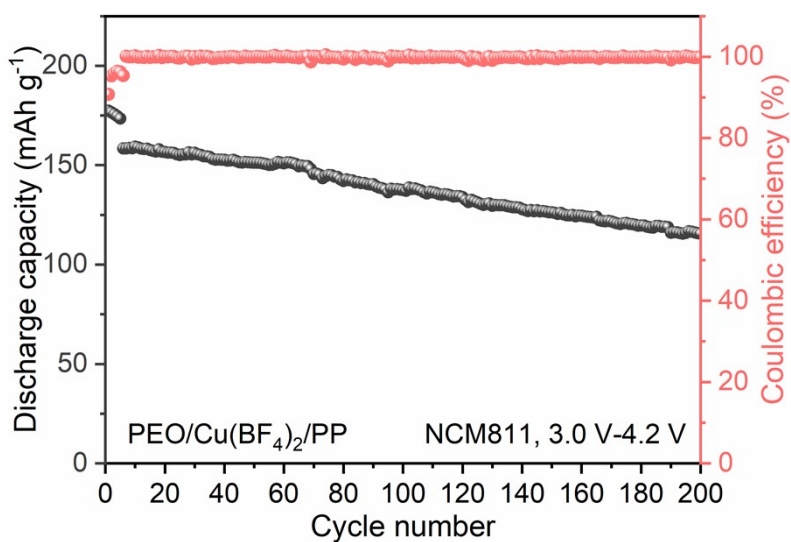

**Fig. S15** Cycling performance of the Li|PEO/Cu(BF<sub>4</sub>)<sub>2</sub>/PP|NCM811 cells.

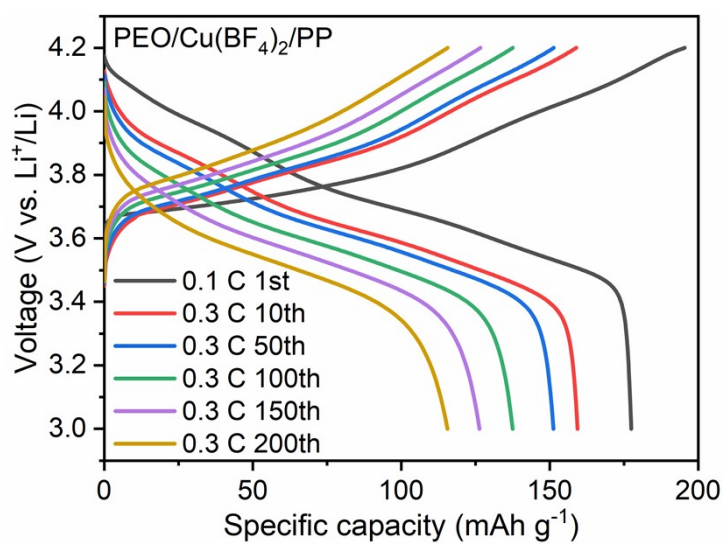

**Fig. S16** Galvanostatic charge/discharge voltage profiles of the Li|PEO/Cu(BF<sub>4</sub>)<sub>2</sub>/PP|NCM811 cells in the different cycles.

**Table S1.** Ionic conductivities and the corresponding  $E_a$  values for PEO/LiTFSI.

| Solid polymer electrolyte | Temperature (°C) | Ionic conductivity (S cm <sup>-1</sup> ) | $\Delta E_a$ (eV) |
|---------------------------|------------------|------------------------------------------|-------------------|
| PEO/LiTFSI                | 25               | $8.34 \times 10^{-6}$                    | 0.38              |
|                           | 30               | $1.43 \times 10^{-5}$                    |                   |
|                           | 40               | $4.34 \times 10^{-5}$                    |                   |
|                           | 50               | $9.04 \times 10^{-5}$                    | 0.22              |
|                           | 60               | $1.54 \times 10^{-4}$                    |                   |
|                           | 70               | $2.58 \times 10^{-4}$                    |                   |

**Table S2.** Ionic conductivities and the corresponding  $E_a$  values for PEO/Zn(BF<sub>4</sub>)<sub>2</sub>.

| Solid polymer electrolyte             | Temperature (°C) | Ionic conductivity (S cm <sup>-1</sup> ) | $\Delta E_a$ (eV) |
|---------------------------------------|------------------|------------------------------------------|-------------------|
| PEO/Zn(BF <sub>4</sub> ) <sub>2</sub> | 25               | $3.94 \times 10^{-5}$                    | 0.28              |
|                                       | 30               | $5.85 \times 10^{-5}$                    |                   |
|                                       | 40               | $1.36 \times 10^{-4}$                    |                   |
|                                       | 50               | $2.77 \times 10^{-4}$                    | 0.15              |
|                                       | 60               | $3.98 \times 10^{-4}$                    |                   |
|                                       | 70               | $5.83 \times 10^{-4}$                    |                   |

**Table S3.** Thermal property data of SPEs obtained from DSC.

| Solid polymer electrolyte             | $T_g$ (°C) | $T_m$ (°C) | $\Delta H_m$ (J g <sup>-1</sup> ) | $X_c$ (%) |
|---------------------------------------|------------|------------|-----------------------------------|-----------|
| PEO/LiTFSI                            | -46.9      | 39.4       | 32.3                              | 25.8      |
| PEO/Zn(BF <sub>4</sub> ) <sub>2</sub> | -52.3      | 40.0       | 26.3                              | 20.6      |
